# Supplementary material for: In-Hospital versus Out-of-Hospital Pulmonary Embolism: Clinical Characteristics, Biochemical Markers and Echocardiographic Indices
Source: MDPI journal article supplement (doi:10.3390/jcdd11040103), 2024-03-28
Supplement: s1 [file s1]

Supplementary Table S1 shows comparisons of several indices depending on simplified Pulmonary Embolism Severity Index (sPESI) in the total population

|                                   |        | sPESI       |            | p                |
|-----------------------------------|--------|-------------|------------|------------------|
|                                   |        | Φυσιολογικό | Παθολογικό |                  |
| <b>Wells or</b>                   | Mean   | 3,27        | 4,13       | <b>0.037</b>     |
|                                   | Median | 3,00        | 4,50       |                  |
|                                   | IQR    | 4,00        | 4,00       |                  |
| <b>Wells s</b>                    | Mean   | 1,56        | 2,10       | <b>0.005</b>     |
|                                   | Median | 1,00        | 2,00       |                  |
|                                   | IQR    | 1,00        | 2,00       |                  |
| Geneva or                         | Mean   | 6,77        | 6,89       | 0.898            |
|                                   | Median | 6,00        | 6,00       |                  |
|                                   | IQR    | 5,00        | 4,00       |                  |
| Geneva s                          | Mean   | 2,72        | 3,07       | 0.088            |
|                                   | Median | 3,00        | 3,00       |                  |
|                                   | IQR    | 1,00        | 2,00       |                  |
| <b>Charlson Comorbidity Index</b> | Mean   | 2           | 5          | <b>&lt;0.001</b> |
|                                   | Median | 2           | 5          |                  |
|                                   | IQR    | 3           | 4          |                  |
| <b>HS Troponin</b>                | Mean   | 102,69      | 351,85     | <b>&lt;0.001</b> |
|                                   | Median | 8,20        | 29,50      |                  |
|                                   | IQR    | 21,70       | 174,60     |                  |
| <b>d dimers</b>                   | Mean   | 4,53        | 7,97       | <b>&lt;0.001</b> |
|                                   | Median | 2,42        | 5,80       |                  |
|                                   | IQR    | 4,67        | 9,88       |                  |
| <b>BNP</b>                        | Mean   | 160         | 276        | <b>&lt;0.001</b> |
|                                   | Median | 54          | 138        |                  |
|                                   | IQR    | 89          | 250        |                  |
